# Supplementary material for: Phase I/Ib study of olaparib and carboplatin in heavily pretreated recurrent high-grade serous ovarian cancer at low genetic risk
Source: PubMed Central journal article supplement (PMC6499601; doi:10.18632/oncotarget.26869), 2019-04-23
Supplement: oncotarget-10-2855-s001.pdf [file oncotarget-10-2855-s001.pdf]

## Phase I/Ib study of olaparib and carboplatin in heavily pretreated recurrent high-grade serous ovarian cancer at low genetic risk

### SUPPLEMENTARY MATERIALS

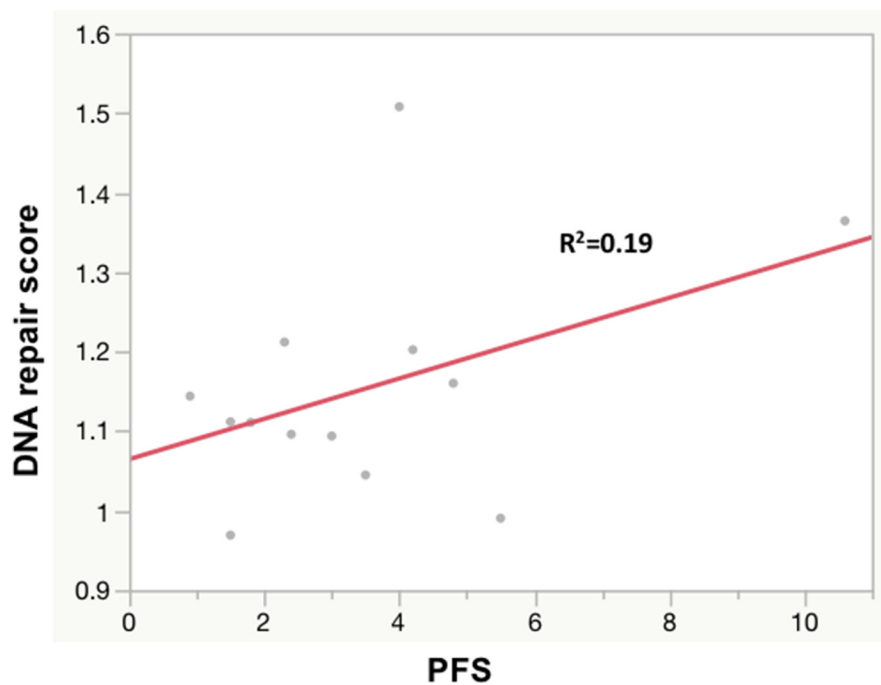

**Supplementary Figure 1: DNA repair score by progression free survival.** There was no correlation between DNA repair score and PFS. Abbreviations: PFS = progression free survival.

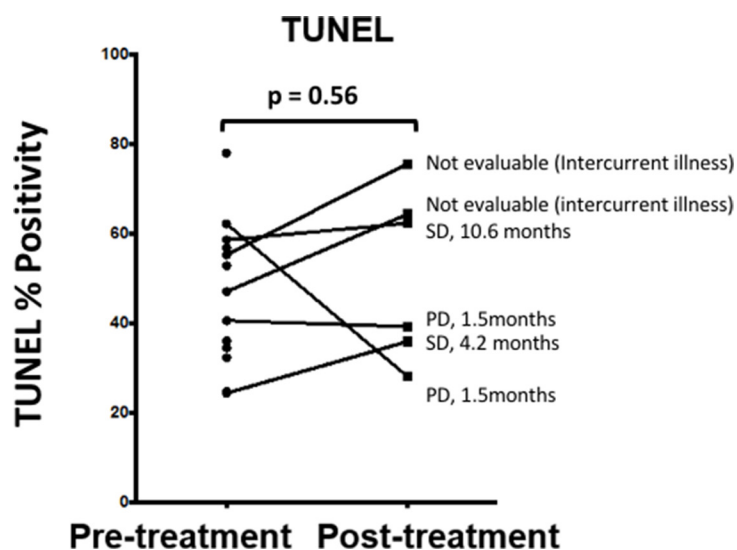

**Supplementary Figure 2: Tissue apoptotic index.** There were no significant differences in tissue apoptotic index before and after cycle 1 treatment with combination therapy of olaparib capsules and carboplatin.

**Supplementary Table 1: 17 Proteins in the original “DNA Repair Score”**

|              |              |
|--------------|--------------|
| <b>pChk1</b> | <b>ATM</b>   |
| FANCD2       | <b>RAD50</b> |
| MRE11        | NBS1         |
| <b>pChk2</b> | <b>MSH2</b>  |
| <b>Chk2</b>  | <b>PARP1</b> |
| <b>pATM</b>  | <b>RAD51</b> |
| <b>XRCC1</b> | BRCA1        |
| <b>53BP1</b> | ATRIP        |
| DNA.PKcs     |              |

Bolded proteins were included in our modified DNA repair score.
